# Supplementary material for: TGF-β1 Decreases Microglia-Mediated Neuroinflammation and Lipid Droplet Accumulation in an In Vitro Stroke Model
Source: MDPI journal article supplement (doi:10.3390/ijms242417329), 2023-12-10
Supplement: s1 [file s1]

## SUPPLEMENTARY MATERIALS

### **TGF- $\beta$ 1 Decreases Microglia-Mediated Neuroinflammation and Lipid Droplet Accumulation in an In Vitro Stroke Model**

Wenqiang Xin<sup>1</sup>, Yongli Pan<sup>1</sup>, Wei Wei<sup>1</sup>, Stefan T Gerner<sup>2,3</sup>, Sabine Huber<sup>2</sup>, Martin Juenemann<sup>2</sup>, Marius Butz<sup>2,4</sup>, Mathias Bähr<sup>1</sup>, Hagen B Huttner<sup>2</sup>, and Thorsten R Doeppner<sup>1-3,5-6</sup>

<sup>1</sup>Department of Neurology, University of Göttingen Medical School, Göttingen, Germany.

<sup>2</sup>Department of Neurology, University of Giessen Medical School, Giessen, Germany.

<sup>3</sup>Center for Mind, Brain and Behavior (CMBB), University of Marburg and Justus Liebig University Giessen, Germany.

<sup>4</sup>Heart and Brain Research Group, Kerckhoff Heart and Thorax Center, Bad Nauheim, Germany.

<sup>5</sup>Department of Anatomy and Cell Biology, Medical University of Varna, Varna, Bulgaria.

<sup>6</sup>Research Institute for Health Sciences and Technologies (SABITA), Medipol University, Istanbul, Turkey.

#### **Correspondence:**

Thorsten R. Doeppner, MD-M.Sc.

Department of Neurology

University of Giessen Medical School, Giessen, Germany

Phone: +49-641- 98545393

Email: [thorsten.doeppner@neuro.med.uni-giessen.de](mailto:thorsten.doeppner@neuro.med.uni-giessen.de)

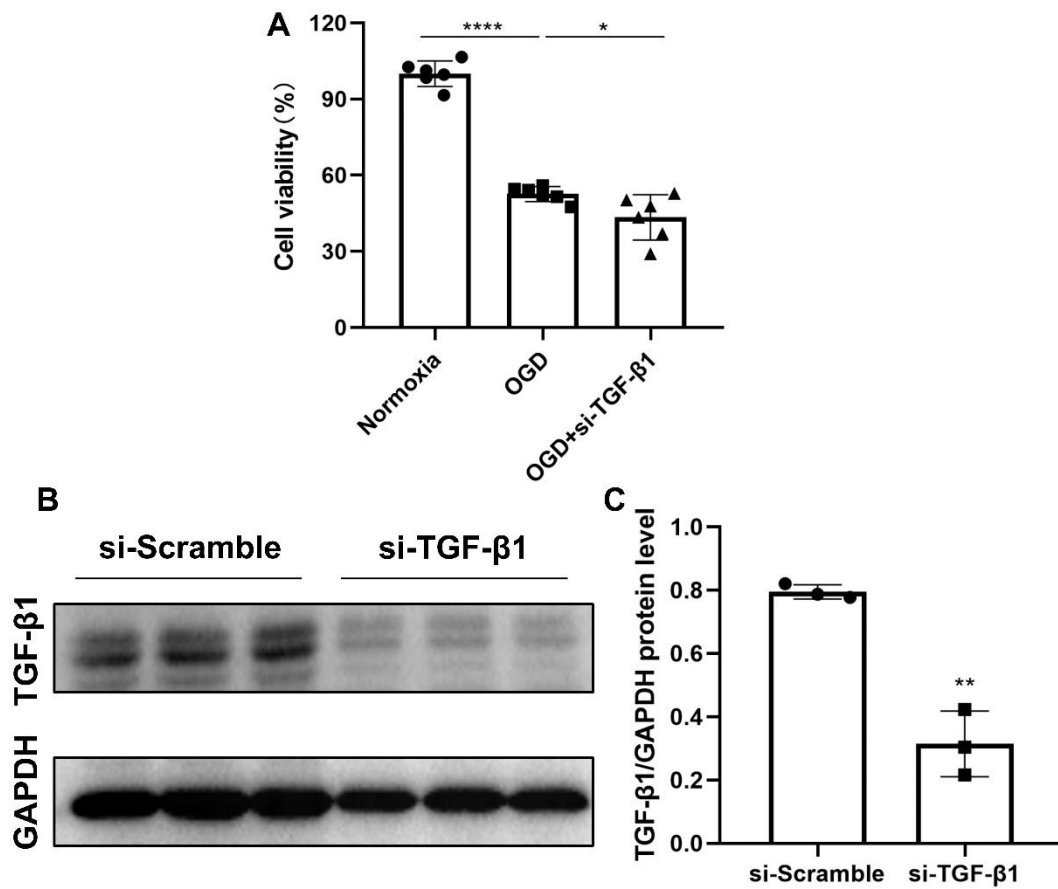

**Figure S1. TGF-β1 siRNA successfully reduces both the expression of TGF-β1 and cell injury in microglia.** (A) The MTT (Thiazolyl Blue Tetrazolium Bromide) assay was used to test microglial cell viability after OGD treated with or without TGF-β1 siRNA. Cells incubated under standard cell culture conditions ('Normoxia') were defined as 100 % cell survival (n = 6). (B-C) A quantitative analysis of TGF-β1 expression using 50 nM of TGF-β1 siRNA for 24 h by western blot analysis normalized with the housekeeping protein GAPDH was conducted in primary microglia. \*p < 0.05; \*\*p < 0.01; \*\*\*\*p < 0.0001. OGD, oxygen-glucose-deprivation; si-TGF-β1, transforming growth factor-β1 siRNA; si-Scramble; siRNA scramble.

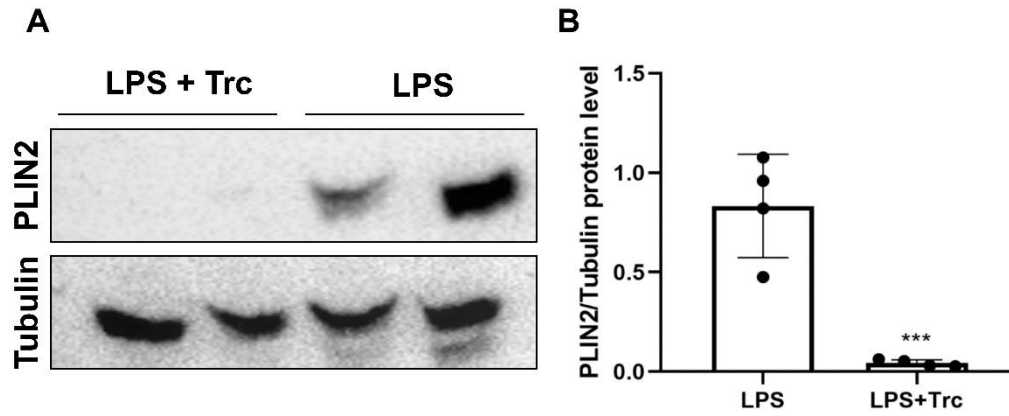

**Figure S2. The effect of Triacsin C on LPS-induced LD accumulation in primary microglia.** Western blot analysis depicts the expression of PLIN2 protein in primary microglia under different conditions, including LPS-treated cells and LPS-treated cells with Triacsin C (n = 4). \*\*\*p < 0.001. LD, lipid droplet(s); LPS, lipopolysaccharide; PLIN2, perilipin2; Trc, Triacsin C.

**Table S1. Sequence information of quantitative real-time PCR analysis primers.**

| <b>Gene name</b>                  | <b>Primer sequence (5'-3')</b> |
|-----------------------------------|--------------------------------|
| <b>rCD206 F</b>                   | CTCTGTTTCAGCTATTGGACGC         |
| <b>rCD206 R</b>                   | CGGAATTTCTGGGATTCAGCTTC        |
| <b>riNOS F</b>                    | AGGAACCTACCAGCTCACTCTG         |
| <b>riNOS R</b>                    | TTTCCTGTGCTGTGCTACAGTT         |
| <b>rIL-1<math>\beta</math> F</b>  | GCAACTGTTCTGAACTCAACT          |
| <b>rIL-1<math>\beta</math> R</b>  | ATCTTTTGGGGTCCGTCCAAC          |
| <b>rIL-10 F</b>                   | AGAAAAGAGAGCTCCATCATGC         |
| <b>rIL-10 R</b>                   | TTATTGTCTTCCCGGCTGTACT         |
| <b>rTNF-<math>\alpha</math> F</b> | AAGCCTGTAGCCACGTCGTA           |
| <b>rTNF-<math>\alpha</math> R</b> | GGCACCCTAGTTGGTTGTCTTTG        |
| <b>rPLIN2 F</b>                   | ACACCCTCCTGTCCAACATC           |
| <b>rPLIN2 R</b>                   | AAGGGACCTACCAGCCAGTT           |
| <b>rTGF-<math>\beta</math>1 F</b> | CCAGATCCTGTCCAACTAAGG          |
| <b>rTGF-<math>\beta</math>1 R</b> | CTCTTTAGCATAGTAGTCCGCT         |
| <b>rPPIA F</b>                    | GAGCTGTTTGCAGACAAAGTTC         |
| <b>rPPIA R</b>                    | CCCTGGCACATGAATCCTGG           |

**Table S2. Antibodies used for immunofluorescence staining and western blots.**

| <b>Antibody</b>                                             | <b>Concentration</b> | <b>Supplier</b>          | <b>Cat. No.</b> | <b>Species</b> |
|-------------------------------------------------------------|----------------------|--------------------------|-----------------|----------------|
| <b>Antibody information for immunofluorescence staining</b> |                      |                          |                 |                |
| Anti-CD68                                                   | 1:250                | BioRad                   | MCA341F         | rat            |
| Anti-Iba1                                                   | 1:250                | WAKO                     | 011-27911       | rabbit         |
| Anti-CD11b                                                  | 1:250                | Abcam                    | ab75476         | rabbit         |
| Anti-CX3CR1                                                 | 1:250                | Thermo Fisher Scientific | PA5-19910       | rabbit         |
| <b>Antibody information for western blots</b>               |                      |                          |                 |                |
| Anti-TGF- $\beta$ 1                                         | 1:1,000              | Abcam                    | ab92486         | rabbit         |
| Anti-PLIN2                                                  | 1:1,000              | PROGEN                   | GP42            | Guinea pig     |
| Anti-Tubulin                                                | 1:10,000             | GeneTex                  | GTX628802       | mouse          |
| Anti-GAPDH                                                  | 1:10,000             | GeneTex                  | GTX627408       | mouse          |
| Anti-rabbit                                                 | 1:10,000             | Abcam                    | ab97051         | goat           |
| Anti-mouse                                                  | 1:10,000             | Abcam                    | ab97023         | goat           |
| Anti-Guinea pig                                             | 1:10,000             | Abcam                    | ab6908          | goat           |

### Supplementary full scans of western blots

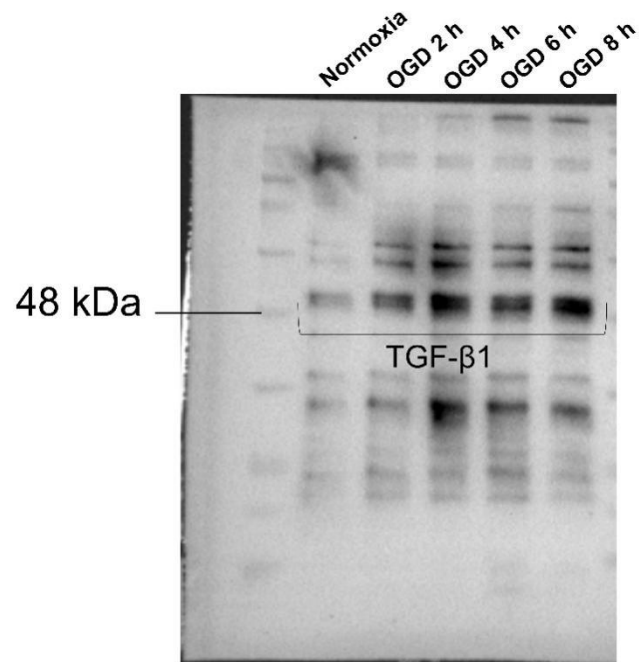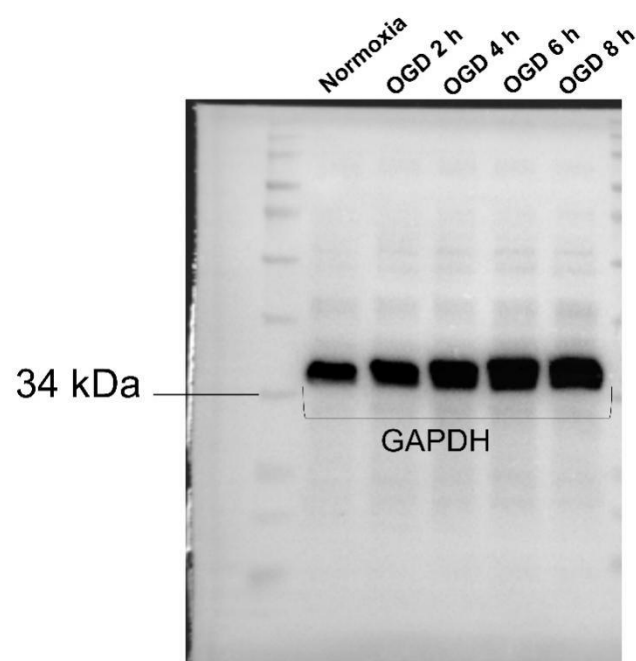

Full scans of western blots shown in Fig. 1G. TGF- $\beta$ 1 and GAPDH.

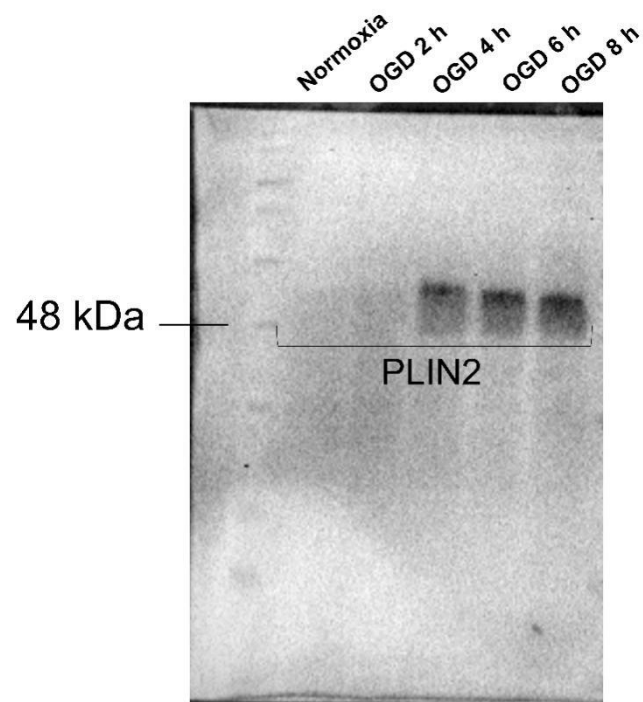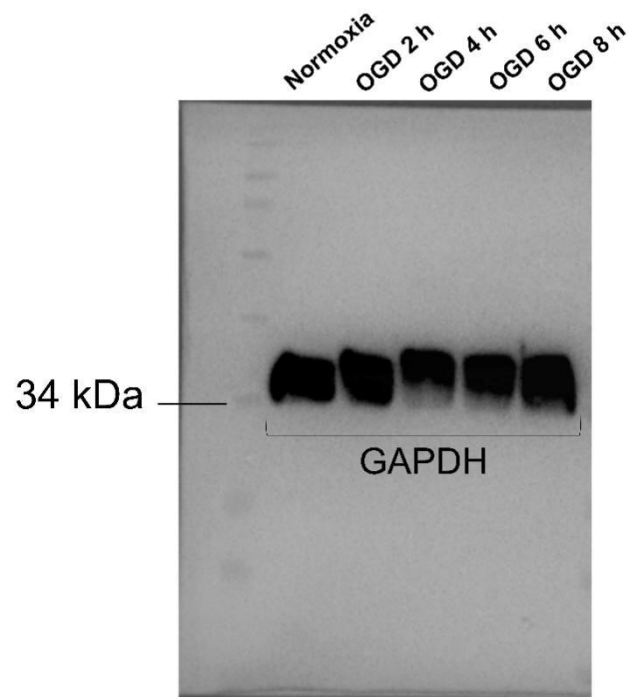

Full scans of western blots shown in Fig. 1H. PLIN2 and GAPDH.

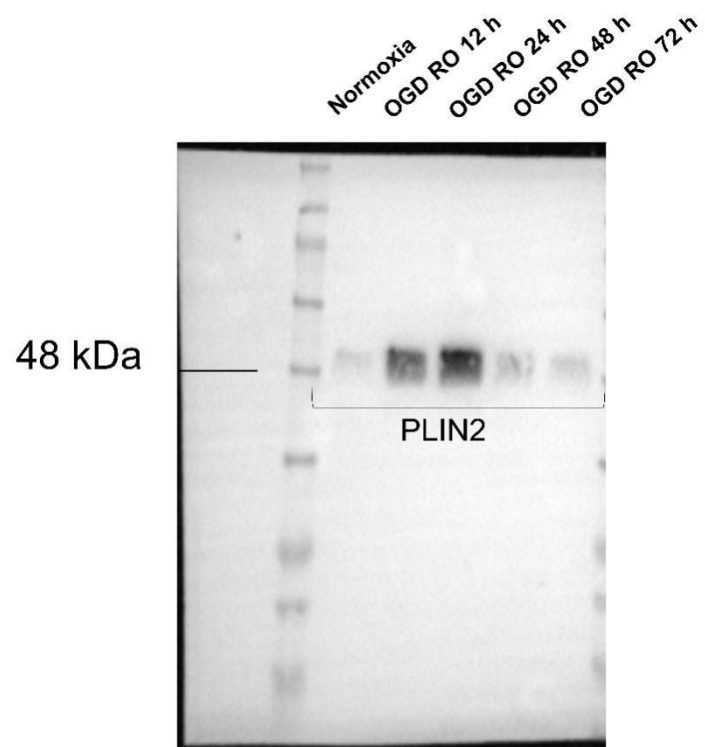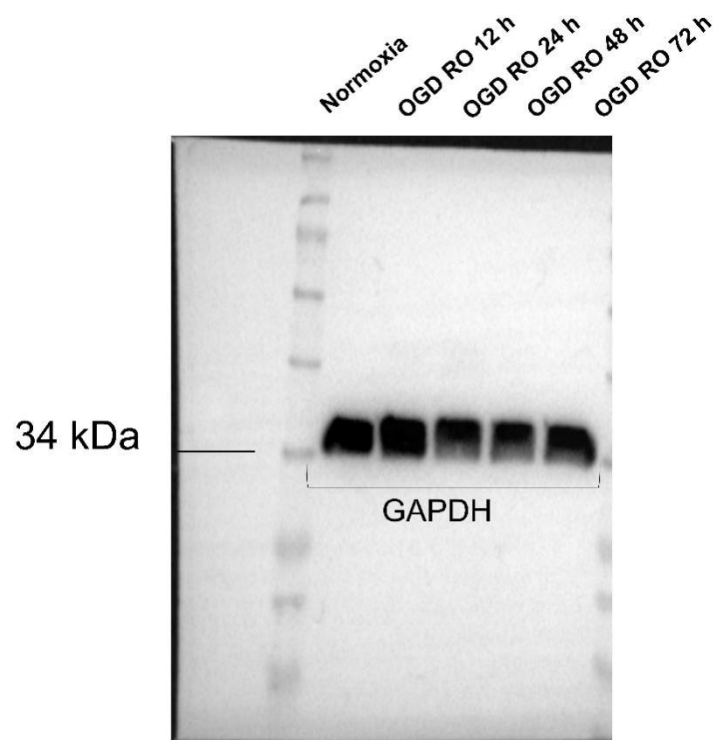

**Full scans of western blots shown in Fig. 2D. PLIN2 and GAPDH.**



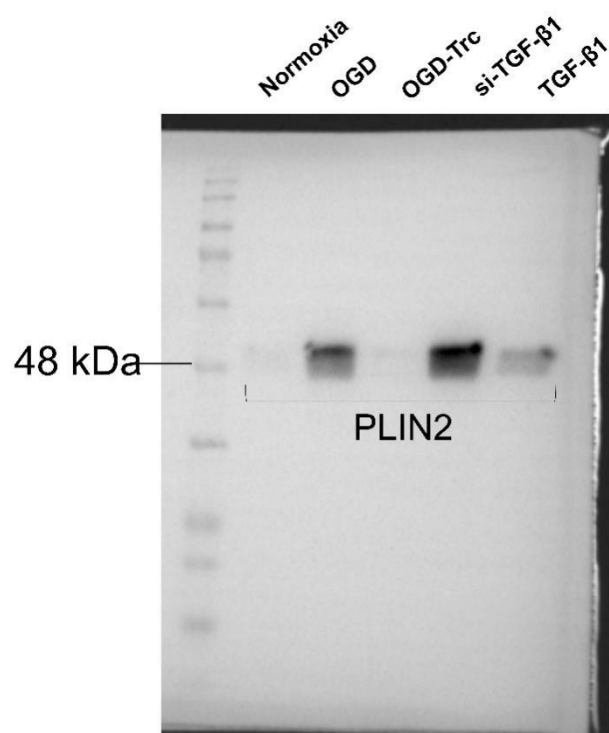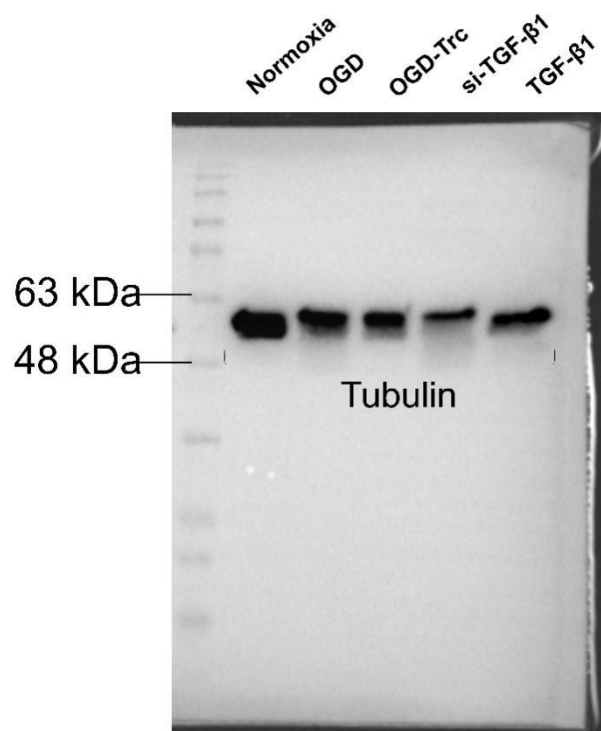

**Full scans of western blots shown in Fig. 3F. PLIN2 and Tubulin.**

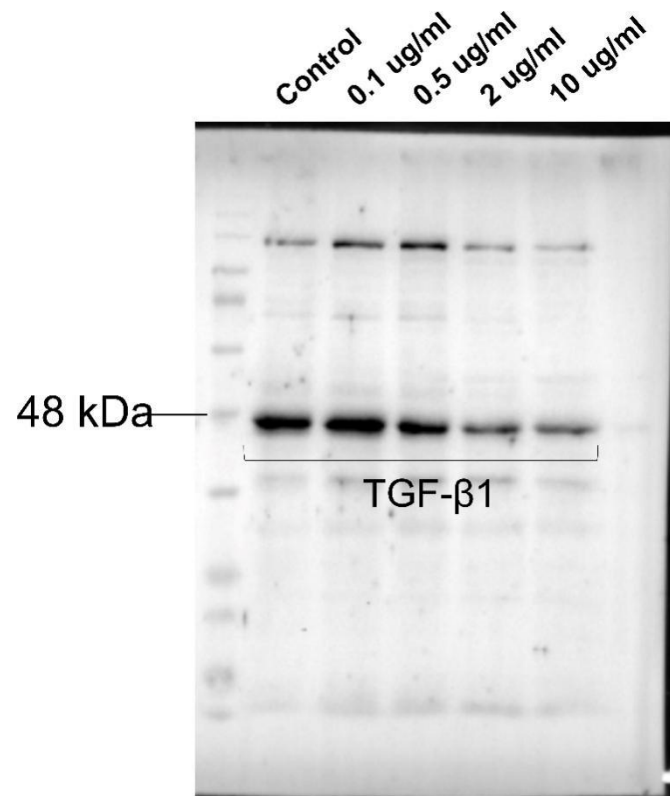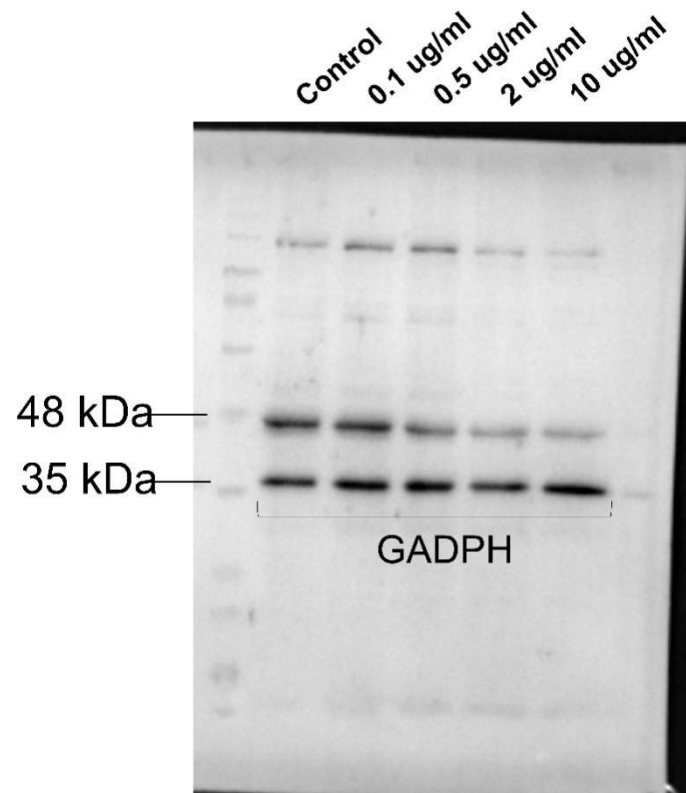

**Full scans of western blots shown in Fig. 4A. TGF- $\beta$ 1 and GAPDH.**

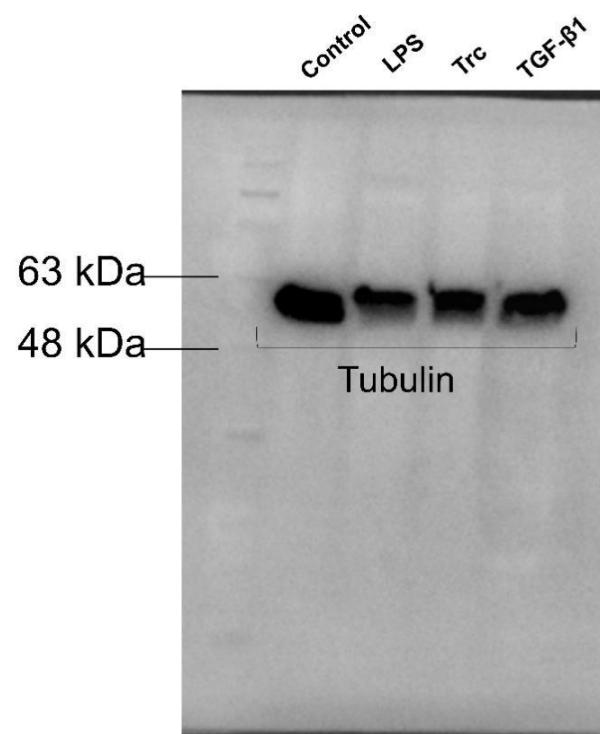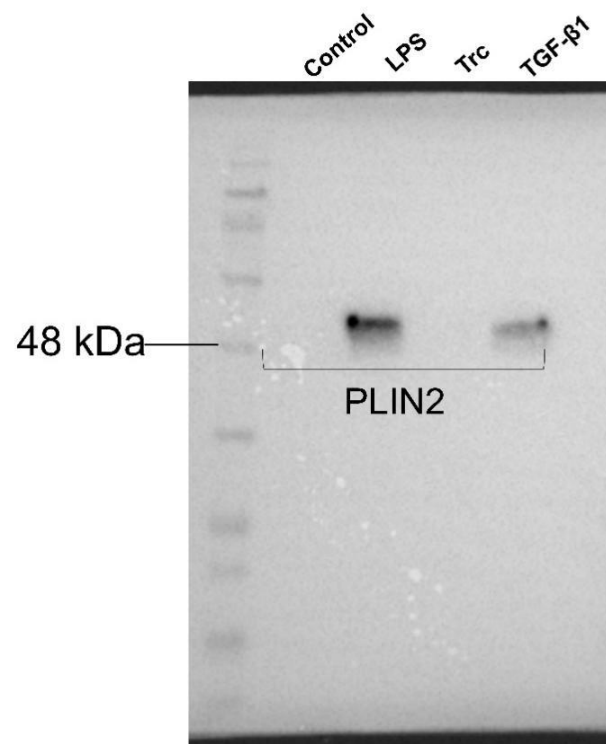

**Full scans of western blots shown in Fig. 4C. PLIN2 and Tubulin.**

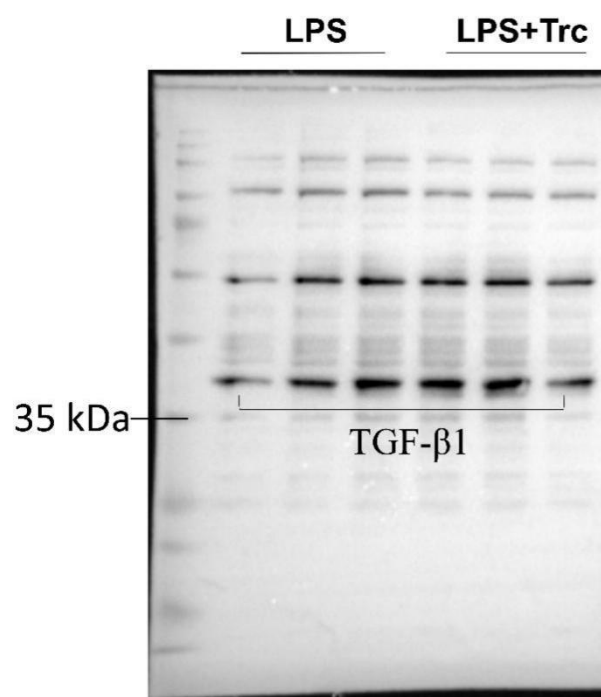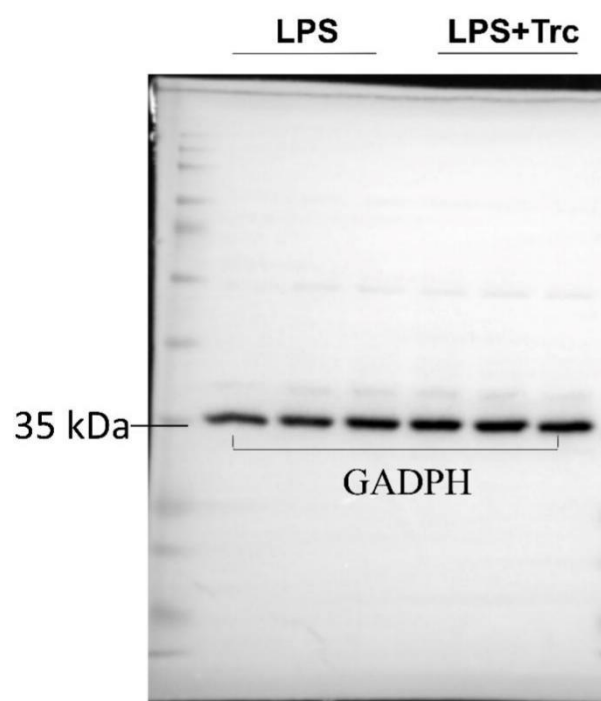

**Full scans of western blots shown in Fig. 6M. TGF-β1 and GAPDH.**

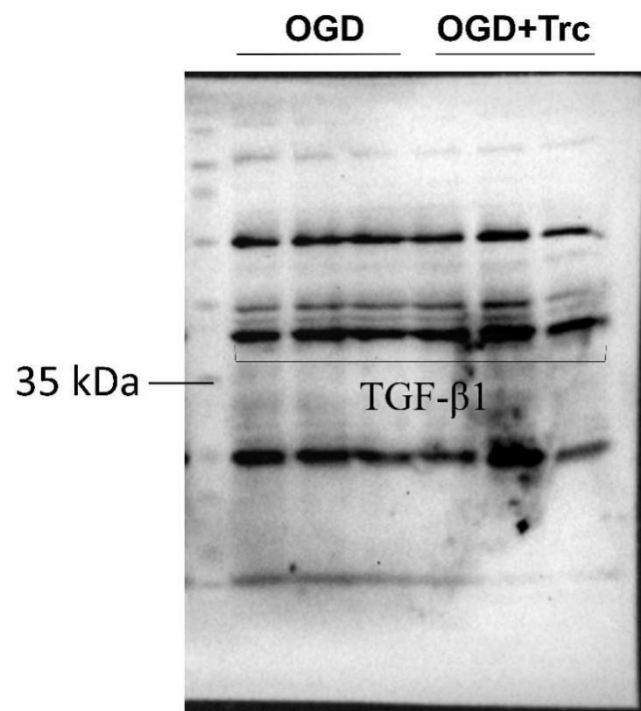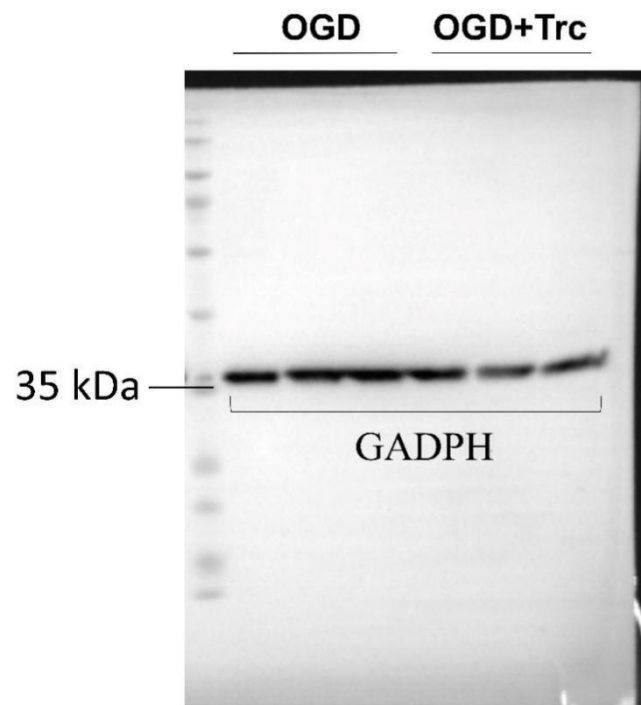

**Full scans of western blots shown in Fig. 6N. TGF- $\beta$ 1 and GAPDH.**

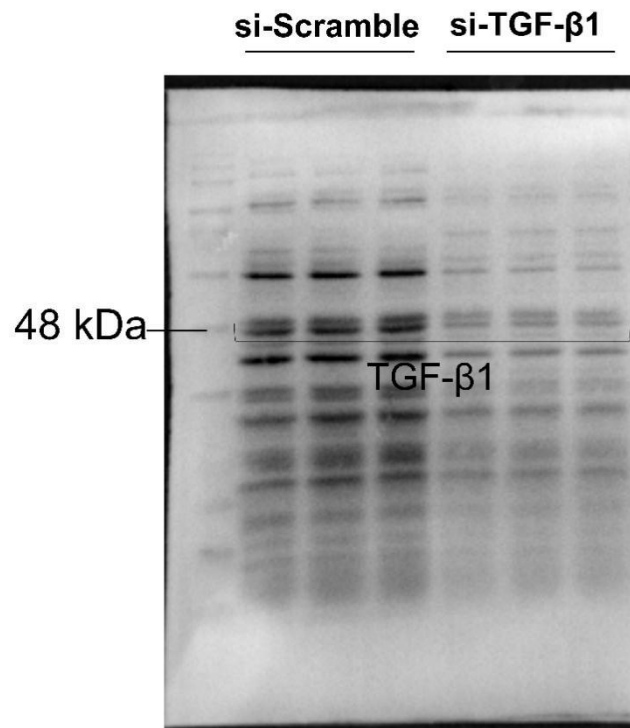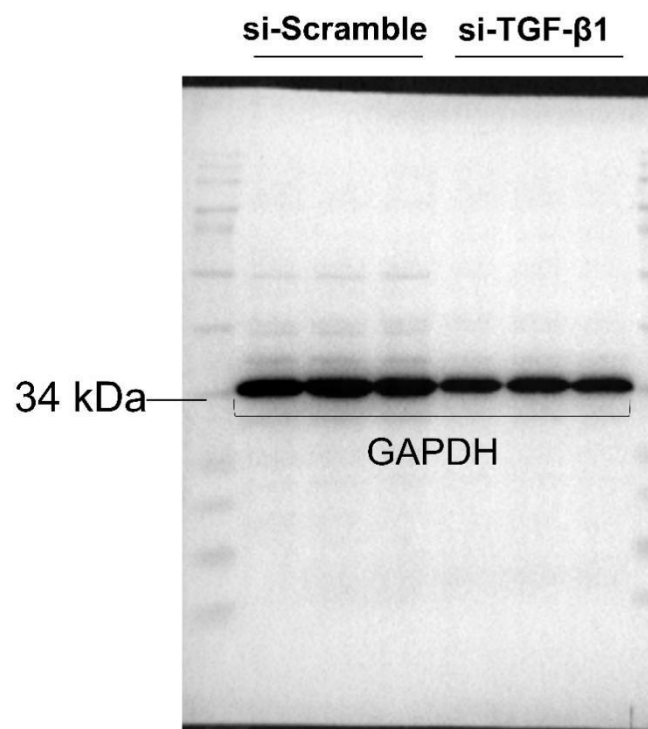

**Full scans of western blots shown in Fig. S1. TGF- $\beta$ 1 and GAPDH.**

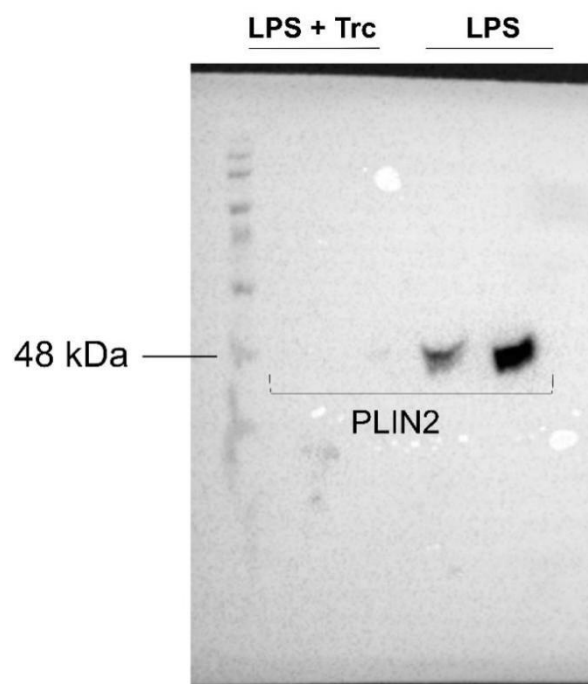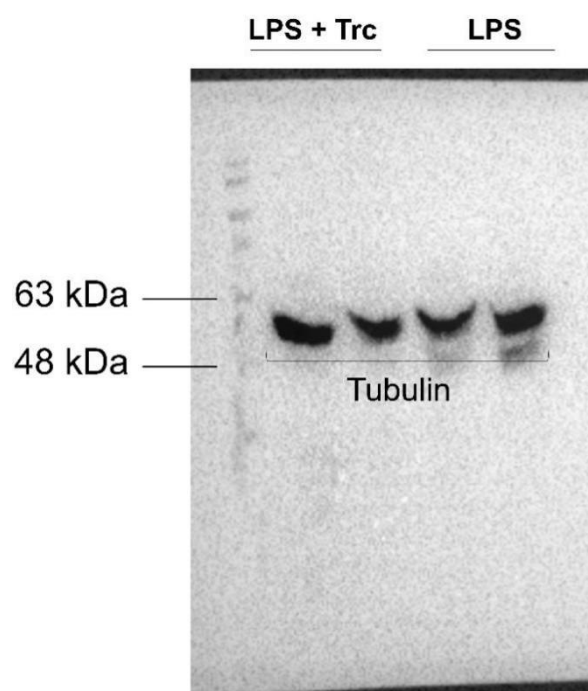

**Full scans of western blots shown in Fig. S4. PLIN2 and Tubulin.**

### Supplementary negative staining controls in primary microglia

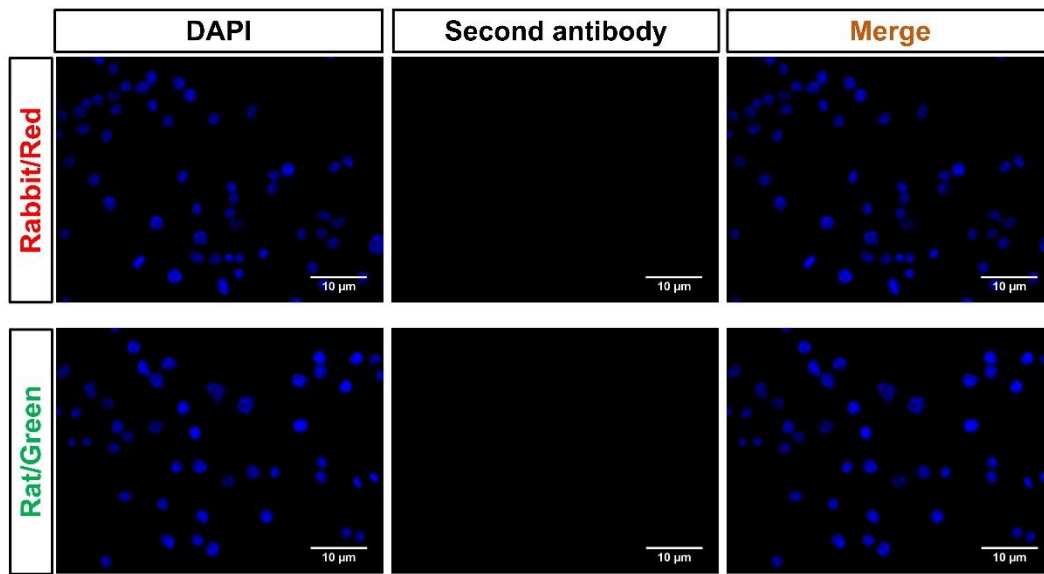

Upper panel: As a negative control, the secondary antibody Cy3 donkey anti-rabbit IgG (1:250, red) was incubated with primary microglia, and there is no unspecific staining on the slides.

Lower panel: As a negative control, the secondary antibody Alexa 488 donkey anti-rat IgG (1:250, green) was incubated with primary microglia, and there is no unspecific staining on the slides.
